# Supplementary material
Source: HighWire-hosted journal article supplement (https://www.annfammed.org/highwire/filestream/14050/field_highwire_adjunct_files/0/Lin.pdf)

## Supplemental materials for

Hong G, Folcarelli A, Less J, Wang C, Erbası N, Lin S. Voice assistants and cancer screening: a comparison of Alexa, Siri, Google Assistant, and Cortana. *Ann Fam Med.* 2021;19(5):447-449.

### SUPPLEMENTAL APPENDICES

#### Supplemental Appendix 1. Reasons behind inaccurate web search and verbal responses

##### Reasons behind inaccurate web search responses

Amazon Alexa (n = 66)

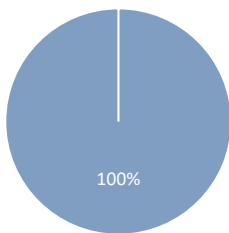

Apple Siri (n = 20)

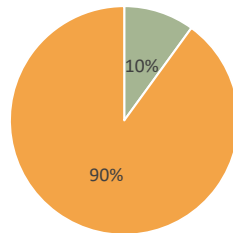

Google Assistant (n = 22)

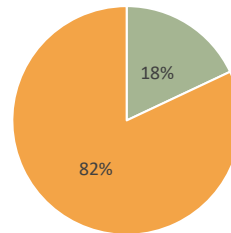

Microsoft Cortana (n = 21)

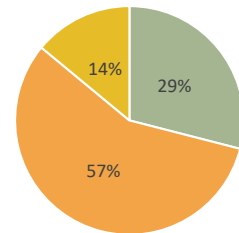

##### Reasons behind inaccurate verbal responses

Amazon Alexa (n = 22)

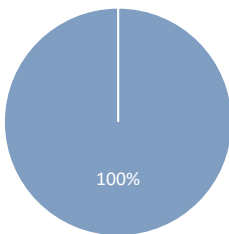

Apple Siri (n = 22)

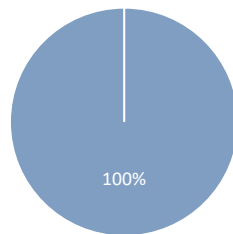

Google Assistant (n = 8)

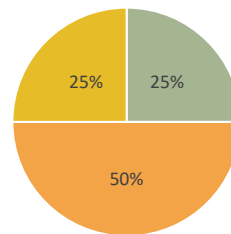

Microsoft Cortana (n = 12)

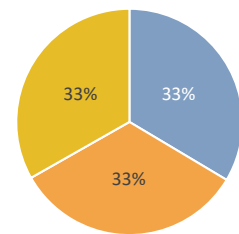

- Could not respond to the query
- Information was irrelevant
- Information contradicted USPSTF guidelines
- Information did not include starting age

Supplemental Appendix 2. Comparison of web search responses referencing websites by for-profit vs. not for-profit organizations

Type of websites referenced in web search results (n = 198)

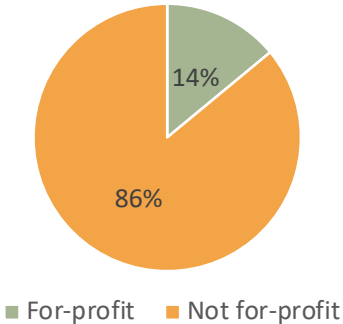

Accuracy of websites referenced in web search results

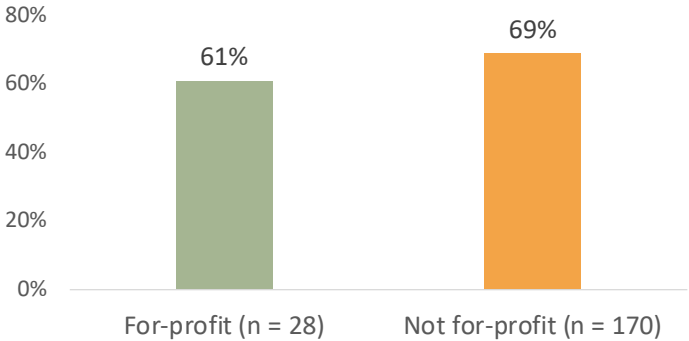

Supplement: Lin.pdf [file Lin.pdf]
